# Supplementary material for: Zinc Protoporphyrin-Rich Pork Liver Homogenates as Coloring Ingredients in Nitrite-Free Liver Pâtés
Source: MDPI journal article supplement (doi:10.3390/foods13040533), 2024-02-09
Supplement: s1 [file s1]

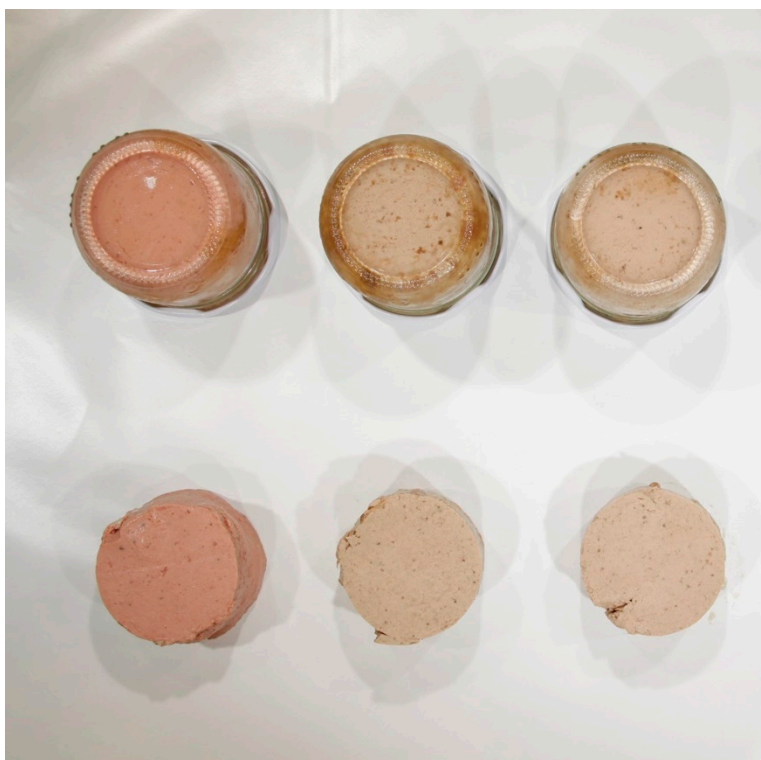

**Supplementary Figure S1.** Pâtés elaborated with nitrites (left), the same formulation but without the addition of nitrites (center), the full replacement of water by the supernatant without the addition of nitrites (right).
